# Supplementary material for: Metabolomic analysis of porcine intestinal epithelial cells during swine acute diarrhea syndrome coronavirus infection
Source: Front Cell Infect Microbiol. 2022 Dec 1;12:1079297. doi: 10.3389/fcimb.2022.1079297 (PMC9751206; doi:10.3389/fcimb.2022.1079297)
Supplement: Supplementary file 1 [file Table_1.xlsx]

## Sheet: Sheet 1
Metabolite.ID
